# Supplementary material for: New diagnostic SNP molecular markers for the Mytilus species complex
Source: PLoS One. 2018 Jul 12;13(7):e0200654. doi: 10.1371/journal.pone.0200654 (PMC6042762; doi:10.1371/journal.pone.0200654)
Supplement: S2 Table — List of the allele-specific primers and common primer designed for the allele-specific PCR genotyping assay. (CSV) [file pone.0200654.s002.csv]

#ID	Marker_SNP	Primer_AlleleHEX	Primer_AlleleFAM	Primer_Common	AlleleHEX	AlleleFAM
E1	130534_A	TTAACATTTTGCGCGACCAACAAATTAT	AACATTTTGCGCGACCAACAAATTAC	TGCAGTTTACCGATTTGGAAGCGGT	T	C
E2	152471_B	ACCTGATATTTACCACAAATTTATTCCATC	ACCTGATATTTACCACAAATTTATTCCATA	TAAGATGGGTAAAGTGKCTCAAGTGATATA	C	A
E3	93454_A	CAGGCCAAAGTGTTTCTTCCTGATA	CAGGCCAAAGTGTTTCTTCCTGATT	GCAAGAGATTACAKATTGGTCACCATATAA	A	T
G1	129715_A	GAGAATGTGTCAAATCAATATAACTGCCT	GAATGTGTCAAATCAATATAACTGCCG	AGAGCCCTAGCAGAAAGAGGAGAAA	T	G
G2	205543_A	AAGGGATTTTATTTTATAAWAGATAAAGATACC	AAGGGATTTTATTTTATAAWAGATAAAGATACA	GCAGATTTAAAGTTGATAAAACTCAACCTA	C	A
G3	220088_B	AATACGTTTGTAACAGTTCTCATCCGT	ACGTTTGTAACAGTTCTCATCCGC	GCAGTYGTAGGGAATCTGTTAGTCATA	T	C
G4	94351_B	AAATGTTGTTTTGTGACAGCCATCTTG	AAATGTTGTTTTGTGACAGCCATCTTC	AACAGCAGCAAACCTTTCATCCTTATCAT	G	C
T1	24411_A	CAAAAAGGAATCTGGTTTATTCGATTCAA	CAAAAAGGAATCTGGTTTATTCGATTCAG	CATAGCAGTCATATAGTAGGGGTAACATT	A	G
T2	33513_A	AAAACAAAATTAATTAGGGATGTTGTGTGC	GAAAACAAAATTAATTAGGGATGTTGTGTGA	CTTCTAAATGTGGATGCCACACAAAGATA	C	A
T3	108748_B	GTCATTTGCGTTAAATTAGCAGTATCG	GTCATTTGCGTTAAATTAGCAGTATCA	CTTCCTTTGCCGCYTCCATTGCAA	G	A
T4	37630_A	GTAAAGGTTGTAATAACCTTGTACAC	CTGTAAAGGTTGTAATAACCTTGTACAT	CAGCATTATACAAAGGATGCTGATGGTTT	C	T
T5	39506_A	AATATTGGCAGGTTGTAGAGGAGGA	AATATTGGCAGGTTGTAGAGGAGGT	AGGGCTAGCAGTGTAAGACCCAATA	A	T
